# Supplementary material
Source: publisher site journal article supplement (https://www.dovepress.com/article/380980)
Supplement: Supplementary file 1 [file get_supplementary_file.php]

**Knowledge, Practice and Associated factors of Health care workers on Prevention of catheter associated urinary tract infections in South Wollo zone public hospitals, Northeast Ethiopia**

Supplementary Figure 1: Tools to assess knowledge, practice and associated factors of health care workers on prevention of catheter associated urinary tract infections in South Wollo zone public hospitals, Northeast Ethiopia

Date_____________________/month_____________________/year___________________

Name of data collector ________________signature _________questionnaire Code_______

**Part 1: Socio-demographic characteristics of health care workers**

| **Ser. No** | **Questions** | **Responses** | |
| --- | --- | --- | --- |
| 1 | Age | _________ years | |
| 2 | Gender | 1. Male 2. Female | |
| 3 | Religion | 1. Orthodox 3. Protestant 5.Others specify 2. Muslim 4. Catholic | |
| 4 | Marital status | 1. Single 3. Divorced & Separated 2. Married 4.Widowe | |
| 5 | Educational status | 1. Diploma 2. Bachelor 3. Master and doctors | |
| 6 | Profession | 1. Nurse 2. doctors 3.Midwifery | |
| 7 | Years of Experience | ___________ years | |
| 8 | Current working unit | 1. Medical ward  2. Surgical ward  3. Intensive care unit(ICU)  4. Emergency unit  5. MCH  6. Operation room  7. Psychiatry  8. Pediatrics unit  9. Obstetrics/gynecology unit  10. Ophthalmology unit | 11. Chronic illness unit  12. Dental unit  13. OPD  14. Minor OR  15. Neonatal ICU  16. Others (specify)------- |
| 9 | Attending training program about urinary catheter procedures | 1. Yes 2. No | |

**Part 2:-Knowledge of health care workers towards prevention of catheter associated urinary tract infections (CAUTI)**

| **Ser. No** | **Knowledge questions** | **Yes** | **No** |
| --- | --- | --- | --- |
|  | **Considerations and Techniques for Catheter Insertion** |  |  |
| 1 | Silicone is preferable than Teflon-coated and latex catheter materials in reducing the risk of encrustation for long term catheterized patients who have frequent obstruction |  |  |
| 2 | Using alcohol hand sanitizer is comparable to hand washing in preventing CAUTI incidence |  |  |
| 3 | Antiseptic meatal cleaning before catheter insertion is necessary in reducing the incidence of Catheter-associated urinary tract infection |  |  |
| 4 | Routine use of antiseptic lubricants to decrease the risk of infection is necessary for urinary catheter insertion |  |  |
| 5 | Antimicrobial prophylaxis offers greater benefit in reducing the incidence of CAUTI for patients requiring long-term catheterization |  |  |
| 6 | Antiseptic lubricants are more beneficial than non-antiseptic lubricants in reducing the incidence of CAUTI |  |  |
|  | **Different Approaches to Catheterization and Specimens Collecting Methods** |  |  |
| 7 | Meatal cleansing with antiseptic solution post-catheterization offers greater advantage in preventing the incidence of CAUTI |  |  |
| 8 | When obtaining small urine volume for examination, aspirate the urine from the needleless sampling port with a sterile syringe after cleansing the port with a disinfectant |  |  |
| 9 | Obtain large volume of urine for special analysis aseptically from the drainage bag |  |  |
| 10 | If obstruction is anticipated, close continuous irrigation is suggested to prevent obstruction |  |  |
|  | **Proper Urethral Catheter Maintenance** |  |  |
| 11 | Silver coated catheters increase the risk of urethral irritation and antimicrobial resistance among catheterized patients |  |  |
| 12 | Bladder irrigation, instillation, or washout using antiseptic or antimicrobial agent is beneficial in preventing CAUTI |  |  |
| 13 | Adding microbial solutions to drainage bags reduce the incidence of acquiring infection |  |  |
| 14 | Changing indwelling catheters or drainage bags at routine, fixed intervals is recommended for proper catheter maintenance |  |  |
| 15 | There is no benefit of clamping versus free drainage before catheter removal in reducing the risk of bacteriuria in catheterized patients |  |  |

**Part 3: - Practice of health care worker towards prevention of catheter associated urinary tract infections**

| **Ser. No** | **Practice questions** | **Yes** | **No** |
| --- | --- | --- | --- |
| 1 | Do you change indwelling catheter or drainage bags when required? |  |  |
| 2 | Do you use meatal cleansing with antiseptic solution post catheterization to provide greater advantage in preventing the incidence of catheter associated UTI? |  |  |
| 3 | Do you use standard guidelines for catheter care? |  |  |
| 4 | Do you use lubricant during catheter insertion? |  |  |
| 5 | Do you know the best practices for preventing CAUTI associated with obstructed urinary catheters? |  |  |
| 6 | Do you perform hand washing or used any sanitizer while passing urethral catheter? |  |  |
| 7 | Do you inject sterile water into needless port to inflate the balloon? |  |  |
| 8 | Do you offer antimicrobial prophylaxis for patients with long term catheterization? |  |  |
| 9 | Do you properly secure catheters after insertion to prevent movement and urethral traction? |  |  |

**Part 4: - Attitude of health care worker towards prevention of catheter associated urinary tract infections**

| **Ser. No** | **Attitude Questions** | **Agree** | **Disagree** |
| --- | --- | --- | --- |
| 1 | Renewal reminders for catheters prevents CAUTI |  |  |
| 2 | Catheter can be inserted for health care staff convenience |  |  |
| 3 | It helps if CAUTI prevention is in high priority list of hospitals |  |  |
| 4 | CAUTI not a very serious illness |  |  |
| 5 | Education regarding basic catheter care helps prevent CAUTI |  |  |
| 6 | Catheter should be removed whenever it is convenient for health care provider |  |  |
| 7 | CAUTI is a common problem and virtually impossible to prevent it |  |  |
| 8 | Maintaining a closed drainage system prevents CAUTI |  |  |
